# Supplementary material for: Vibrio vulnificus VvhA induces autophagy-related cell death through the lipid raft-dependent c-Src/NOX signaling pathway
Source: PubMed Central journal article supplement (PMC4890043; doi:10.1038/srep27080), 2016-06-02
Supplement: srep27080-s1.pdf [file srep27080-s1.pdf]

## ***Vibrio vulnificus* VvhA induces autophagy-related cell death through the lipid raft-dependent c-Src/NOX signaling pathway**

Eun Ju Song<sup>1,+</sup>, Sei-Jung Lee<sup>1,+</sup>, Hyeon Su Lim<sup>1</sup>, Jun Sung Kim<sup>1</sup>, Kyung Ku Jang<sup>2</sup>, Sang Ho Choi<sup>2</sup>, and Ho Jae Han<sup>1,\*</sup>

### **Supplementary Materials and Methods**

**Purification of the recombinant haemolysin VvhA.** To find the molecular role of VvhA in Caco-2 cells, we prepared a recombinant protein of VvhA (rVvhA) following the method of Lee et al.<sup>1</sup>. Briefly, the coding region of *vvhA* was amplified and then cloned into a His6-tag expression vector, pET29a(+) (Novagen, Madison, WI, USA), resulting in pKS1201 (Supplementary Table S1). *E. coli* BL21 (DE3) carrying the pKS1201 was grown in LB-ampicillin media at 37 °C until reaching an A<sub>600</sub> between 0.5 and 0.6. For inducing the protein expression, the temperature was lowered to 30 °C and the culture treated with 1 mM isopropyl-β-D-thiogalactopyranoside for 6 h. The cells were harvested and prepared for isolating the soluble fraction. Cell lysate containing His<sub>6</sub>-tagged VvhBA protein was mixed with 1 ml of Ni-NTA agarose (Qiagen, Valencia, CA) for 1 h at 4 °C and the mixture was loaded on Bio-Spin Chromatography Columns (Bio-Rad Laboratories, Hercules, CA, USA). The resin was washed with buffer A, and bound VvhBA protein was eluted with buffer A containing 300 mM imidazole. After purification, the homogeneity of VvhBA was assessed by 12 % SDS-PAGE and Coomassie Blue staining. Purified proteins containing rVvhA was dialyzed against 20 mM Tris-Cl, pH 8.0, concentrated to 0.3 mg/mL using Slide-A-Lyzer Dialysis Cassettes (Thermo Scientific, Hudson, NH, USA), and stored at -80 °C until use.

**Bacterial strains, plasmids, and culture media.** The strains and plasmid used in the present study

are listed in Supplementary Table S1. All *V. vulnificus* strains (M06-24/O WT and M06-24/O *vvhA*) are isogenic and naturally resistant to polymyxin B. *V. vulnificus* strains were cultured in LB medium supplemented with 2.0 % (w/v) NaCl (LBS) at 30 °C. All media components were obtained from Difco Laboratories (Detroit, MI, USA). The bacterial strains were grown to mid-log phase ( $A_{600} = 0.500$ ) corresponding  $2 \times 10^8$  CFU/mL and centrifuged at  $6000 \times g$  for 5 min. The pellet was washed with PBS and prepared to desired colony-forming unit (CFU)/mL based on the  $A_{600}$  determined using a UV–VIS spectrophotometer (UV-1800, Shimadzu, Japan).

**Complementation of the *vvhA* mutant.** To complement the *vvhA* mutation, an open reading frame (ORF) of *vvhA* was amplified from the genomic DNA of *Vibrio vulnificus* MO6-24/O by PCR with the primer pair VVHA001F and VVHA001R (Supplementary Table S2) and then digested with BamHI. The amplified *vvhA* ORF was subcloned into the broad-host-range vector pRK415 linearized with the same enzyme (Supplementary Table S1) to result in pKK1449<sup>2</sup>. *Escherichia coli* S17-1  $\lambda$  *pir*; *tra* strain containing pKK1449 was used as a conjugal donor to *vvhA* mutant<sup>3</sup>. The plasmid pKK1449 was delivered into the *vvhA* mutant by conjugation as described previously<sup>4</sup>.

## References for Supplementary

1. Lee, S. et al. *Vibrio vulnificus* VvhA induces NF- $\kappa$ B-dependent mitochondrial cell death via lipid raft-mediated ROS production in intestinal epithelial cells. *Cell death & disease* 6, 1655 (2015).
2. Keen, N., Tamaki, S., Kobayashi, D. & Trollinger, D. Improved broad-host-range plasmids for DNA cloning in gram-negative bacteria. *Gene* 70, 191-197 (1988).
3. Simon, R., Priefer, U. & Pühler, A. A broad host range mobilization system for *in vivo* genetic-engineering-transposon mutagenesis in gram-negative bacteria. *Bio-technology* 1 (1983).
4. Park, J. H. et al. Correction: The *cabABC* Operon Essential for Biofilm and Rugose Colony Development in *Vibrio vulnificus*. *PLoS pathogens* 11, e1005252-e1005252 (2015).

**Supplementary Table 1. Plasmids and bacterial strains used in this study**

| Strain or plasmid          | Relevant characteristics <sup>a</sup>                                                                                                                                                                           | Reference or source                     |
|----------------------------|-----------------------------------------------------------------------------------------------------------------------------------------------------------------------------------------------------------------|-----------------------------------------|
| <b>Bacterial strains</b>   |                                                                                                                                                                                                                 |                                         |
| <i>V. vulnificus</i>       |                                                                                                                                                                                                                 |                                         |
| M06-24/O                   | Clinical isolate; virulent; WT                                                                                                                                                                                  | Laboratory collection                   |
| <i>E. coli</i>             |                                                                                                                                                                                                                 |                                         |
| BL21 (DE3)                 | F <sup>-</sup> <i>ompT hsdS<sub>B</sub> (r<sub>B</sub><sup>-</sup> m<sub>B</sub><sup>-</sup>) gal dcm</i> (DE3)                                                                                                 | Laboratory collection                   |
| S17-1 $\lambda$ <i>pir</i> | $\lambda$ - <i>pir</i> lysogen; <i>thi pro hsdR hsdM<sup>+</sup> recA</i> RP4-2 Tc <sup>r</sup> ::Mu-Km <sup>r</sup> ::Tn7;Tp <sup>r</sup> Sm <sup>r</sup> ; host for $\pi$ -requiring plasmids; conjugal donor | Simon <i>et al.</i> , 1983 <sup>3</sup> |
| <b>Plasmids</b>            |                                                                                                                                                                                                                 |                                         |
| pET29a(+)                  | His <sub>6</sub> tag fusion expression vector; Km <sup>r</sup>                                                                                                                                                  | Novagen                                 |
| pKS1201                    | pET29a(+) with VvhBA; Km <sup>r</sup>                                                                                                                                                                           | Lee <i>et al.</i> , 2015 <sup>1</sup>   |
| pRK415                     | IncP <i>ori</i> ; broad-host-range vector, <i>oriT</i> of RP4; Tc <sup>r</sup>                                                                                                                                  | Keen <i>et al.</i> , 1988 <sup>2</sup>  |
| pKK1449                    | pRK415 with <i>vvhA</i> ; Tc <sup>r</sup>                                                                                                                                                                       | This study                              |

<sup>a</sup> Tp<sup>r</sup>, trimethoprim resistant; Sm<sup>r</sup>, streptomycin resistant; Tc<sup>r</sup>, tetracycline resistant

**Supplementary Table 2. Sequences of primer pairs used in this study.**

| <b>Genes</b>   | <b>Forward primer/reverse primer</b>                                          |
|----------------|-------------------------------------------------------------------------------|
| ULK1           | 5'-CAGAACTACCAGCGCATTGA-3'<br>5'-TCCACCCAGAGACATCTTCC-3'                      |
| ULK2           | 5'-CTCCTCAGGTTCTCCAGTGC-3'<br>5'-TTGGTGGGAGAAGTTCCAAG-3'                      |
| ATG14          | 5'-TCACCATCCAGGAACTCACA-3'<br>5'-TTCAGTCTTCGGCTGAGGTT-3'                      |
| VPS34          | 5'-ATGTGTATGGTCCCGGAAAA-3'<br>5'-TGTCGATGAGCTTTGGTGAG-3'                      |
| BECLIN-1       | 5'-GCCCTTTGAAGTACGAGCAG-3'<br>5'-GAGATCATCCACCTGCACT-3'                       |
| ATG5           | 5'-CGGGAACACCAAGTTTCACT-3'<br>5'-TCTGGGGAGACATCCGTAAG-3'                      |
| ATG12          | 5'-TGGGATTGCAAAATGACAGA-3'<br>5'-TTCCCATCTTCAGGATCAA-3'                       |
| ATG16L1        | 5'-GTCTTCGATGCACATGATGG-3'<br>5'-GATTTCGGCTTGCAAAATCAT-3'                     |
| LC3B           | 5'-AGCAGCATCCAACCAAAATC-3'<br>5'-CTGTGTCCGTTACCAACAG-3'                       |
| P62/SQSTM1     | 5'-CACCTGTCTGAGGGCTTCTC-3'<br>5'-CACACTCTCCCAACGTTCT-3'                       |
| RAB7           | 5'-CTGACCAAGGAGGTGATGGT-3'<br>5'-CTGGCCTGGATGAGAACTC-3'                       |
| FYCO1          | 5'-GGAGCTAGGAGCAGCAGAGA-3'<br>5'-CGCATCACTGGGAATAGGTT-3'                      |
| LAMP1          | 5'-CTTCAGCAGGGGAGAGACAC-3'<br>5'-TGTTGGGGTTGATGTTGAGA-3'                      |
| LAMP2          | 5'-GGTTAATGGCTCCGTTTTCA-3'<br>5'-ATGGGCACAAGGAAGTTGTC-3'                      |
| $\beta$ -Actin | 5'-AACC GCGAGAAGATGACCCAGATCATGTTT-3'<br>5'-AGCAGCCGTGGCCATCTCTTGCTCGAAGTC-3' |

**Supplementary Table 3. Oligonucleotides used in this study**

| Name                              | Oligonucleotide Sequence (5' → 3') <sup>a, b</sup> | Use                                     |
|-----------------------------------|----------------------------------------------------|-----------------------------------------|
| <b>For mutant complementation</b> |                                                    |                                         |
| VVHA001F                          | <u>GGATCCA</u> ACCCTTACTCGTAATG                    | Amplification of the<br><i>vvhA</i> ORF |
| VVHA001R                          | GGATCCCTAGAGTTTGACTTGTTG                           |                                         |

<sup>a</sup> The oligonucleotides were designed using the *V. vulnificus* MO6-24/O genomic sequence (GenBank<sup>TM</sup> accession number CP002469 and CP002470, [www.ncbi.nlm.nih.gov](http://www.ncbi.nlm.nih.gov)).

<sup>b</sup> Regions of oligonucleotides not complementary to the corresponding genes are underlined.

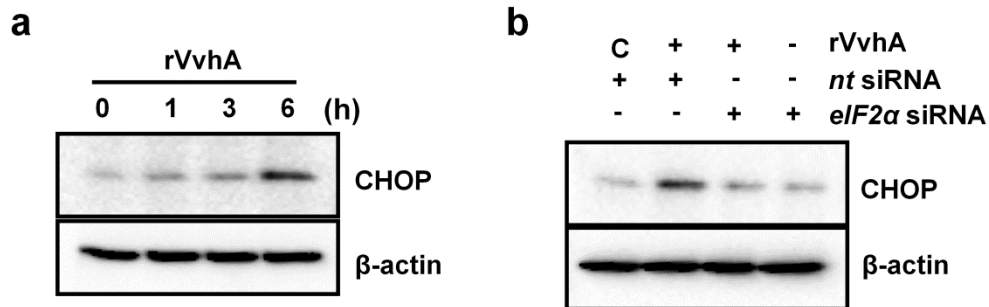

**Supplementary Figure 1. Effect of rVvhA on ER stress.**

(a) Time responses of rVvhA in the expression of CHOP were confirmed by western blotting. n = 3. (b) Cells were transfected for 36 h with *eIF2α* or *non-targeting* (*nt*) siRNA using TurboFect Transfection Reagent prior to rVvhA exposure for 6 h. CHOP expression was analyzed by using Western blot. n = 3.

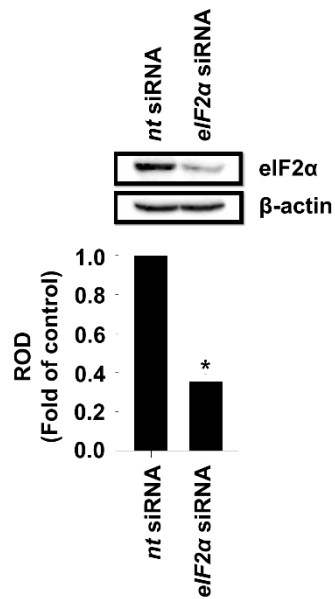

**Supplementary Figure 2. Effect of siRNA on target protein.** Cells were transfected for 36 h with *eIF2α* or *non-targeting* (*nt*) siRNA using TurboFect Transfection Reagent. Protein expressions were analyzed by using Western blot. The knockdown efficacies of eIF2α was 65%. Error bars represent the means  $\pm$  S.E. \* $P < 0.05$  vs *nt* siRNA
